# Supplementary material
Source: Springer Nature journal article supplement (https://springermedizin.de/resource/supplementary/13063_2010_629_MOESM2_ESM.pdf/9618902)

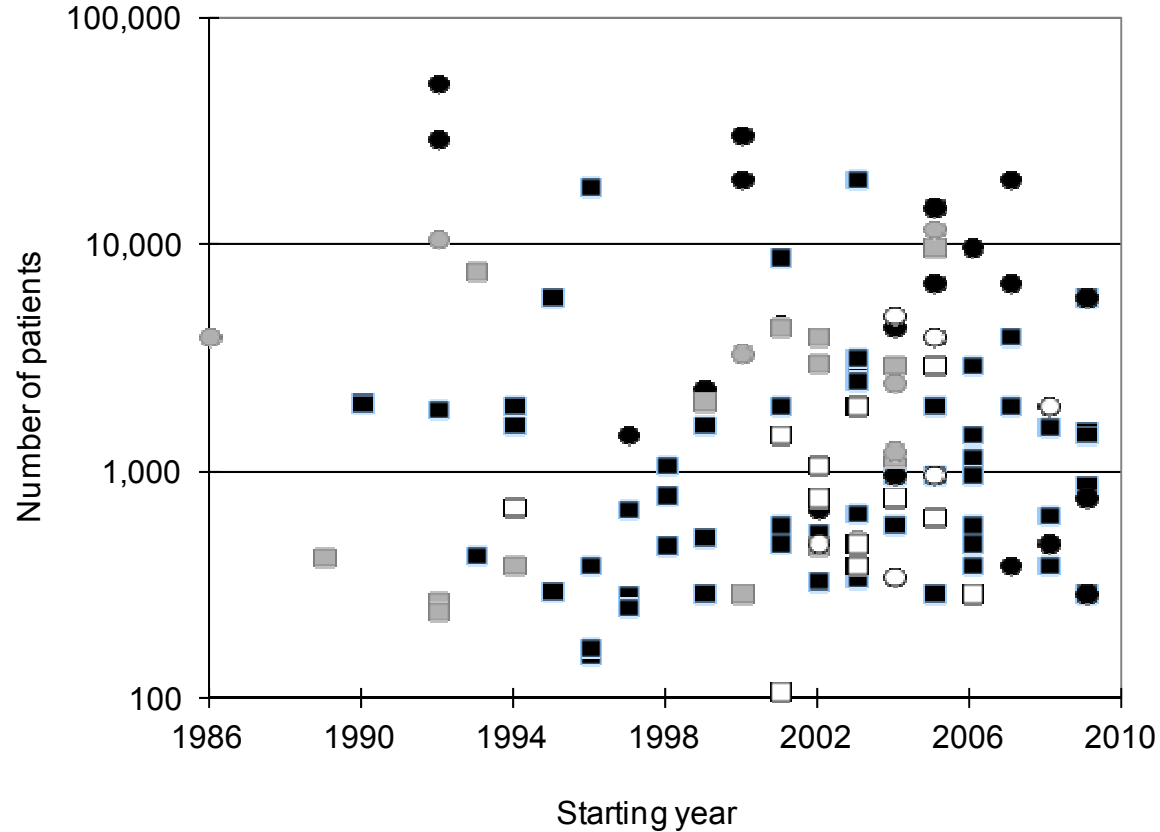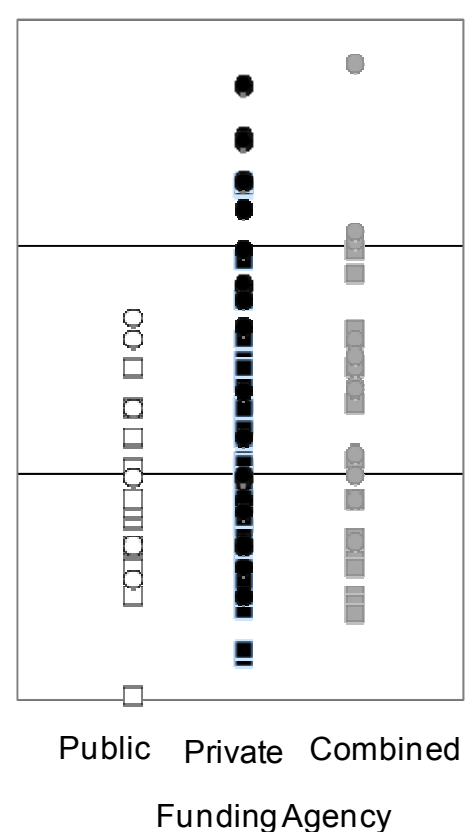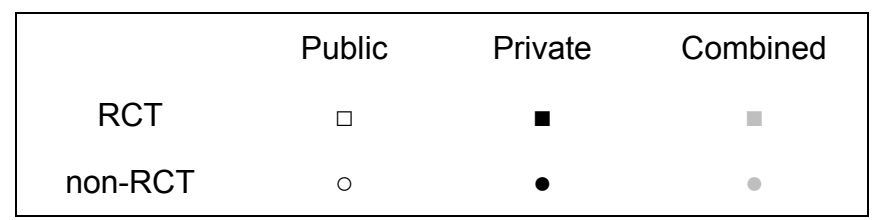

Supplement: MOESM2 [file 9618902]
